# Supplementary material
Source: publisher site journal article supplement (https://www.dovepress.com/article/450048)
Supplement: Supplementary file 1 [file get_supplementary_file.php]

**Supplementary Table 1** Enriched GO and KEGG pathways of genes in the PTR-GUS set

| <b>A</b><br>ID | <b>GO-BP</b><br>Description                          | Count in geneset | pvalue   | p.adjust |
|----------------|------------------------------------------------------|------------------|----------|----------|
| GO:0051607     | defense response to virus                            | 48               | 1.26E-18 | 3.42E-15 |
| GO:0140546     | defense response to symbiont                         | 48               | 1.45E-18 | 3.42E-15 |
| GO:0009615     | response to virus                                    | 55               | 6.66E-18 | 1.05E-14 |
| GO:0045071     | negative regulation of viral genome                  | 20               | 1.97E-15 | 2.32E-12 |
| GO:0048525     | negative regulation of viral process                 | 23               | 4.79E-14 | 4.51E-11 |
| GO:0050792     | regulation of viral process                          | 29               | 3.61E-13 | 2.83E-10 |
| GO:1903900     | regulation of viral life cycle                       | 27               | 5.26E-13 | 3.28E-10 |
| GO:0008544     | epidermis development                                | 44               | 5.58E-13 | 3.28E-10 |
| GO:0045069     | regulation of viral genome replication               | 21               | 1.61E-12 | 8.00E-10 |
| GO:0043588     | skin development                                     | 39               | 1.79E-12 | 8.00E-10 |
| GO:0002237     | response to molecule of bacterial origin             | 43               | 1.87E-12 | 8.00E-10 |
| GO:0045787     | positive regulation of cell cycle                    | 43               | 2.26E-12 | 8.85E-10 |
| GO:0032496     | response to lipopolysaccharide                       | 41               | 4.14E-12 | 1.47E-09 |
| GO:0140014     | mitotic nuclear division                             | 40               | 4.37E-12 | 1.47E-09 |
| GO:0000280     | nuclear division                                     | 50               | 5.59E-12 | 1.76E-09 |
| GO:0031424     | keratinization                                       | 20               | 7.21E-12 | 2.12E-09 |
| GO:0019221     | cytokine-mediated signaling pathway                  | 50               | 1.73E-11 | 4.69E-09 |
| GO:0032103     | positive regulation of response to external stimulus | 48               | 1.79E-11 | 4.69E-09 |
| GO:0019079     | viral genome replication                             | 24               | 2.00E-11 | 4.95E-09 |
| GO:0000070     | mitotic sister chromatid segregation                 | 30               | 2.61E-11 | 6.15E-09 |
| GO:0030216     | keratinocyte differentiation                         | 27               | 4.28E-11 | 9.59E-09 |
| GO:0007059     | chromosome segregation                               | 42               | 5.04E-11 | 1.08E-08 |
| GO:0000819     | sister chromatid segregation                         | 32               | 7.03E-11 | 1.44E-08 |
| GO:0007088     | regulation of mitotic nuclear division               | 22               | 1.13E-10 | 2.18E-08 |
| GO:0002831     | regulation of response to biotic stimulus            | 40               | 1.16E-10 | 2.18E-08 |
| GO:0090068     | positive regulation of cell cycle process            | 33               | 1.49E-10 | 2.68E-08 |
| GO:0052548     | regulation of endopeptidase activity                 | 44               | 1.57E-10 | 2.68E-08 |
| GO:0019058     | viral life cycle                                     | 37               | 1.59E-10 | 2.68E-08 |
| GO:0051983     | regulation of chromosome segregation                 | 23               | 1.77E-10 | 2.88E-08 |
| GO:0009913     | epidermal cell differentiation                       | 31               | 2.04E-10 | 3.21E-08 |
| GO:0051783     | regulation of nuclear division                       | 24               | 2.15E-10 | 3.27E-08 |
| GO:1905818     | regulation of chromosome separation                  | 21               | 2.25E-10 | 3.31E-08 |
| GO:0051304     | chromosome separation                                | 23               | 2.83E-10 | 4.03E-08 |
| GO:0001819     | positive regulation of cytokine production           | 47               | 2.91E-10 | 4.03E-08 |
| GO:0016032     | viral process                                        | 43               | 3.13E-10 | 4.21E-08 |
| GO:0034340     | response to type I interferon                        | 18               | 4.24E-10 | 5.54E-08 |
| GO:0052547     | regulation of peptidase activity                     | 45               | 4.55E-10 | 5.78E-08 |
| GO:0050777     | negative regulation of immune response               | 27               | 5.69E-10 | 7.05E-08 |
| GO:0071216     | cellular response to biotic stimulus                 | 32               | 6.91E-10 | 8.35E-08 |
| GO:0098813     | nuclear chromosome segregation                       | 36               | 7.20E-10 | 8.47E-08 |
| GO:0031349     | positive regulation of defense response              | 35               | 8.00E-10 | 9.04E-08 |
| GO:0071219     | cellular response to molecule of bacterial origin    | 30               | 8.06E-10 | 9.04E-08 |
| GO:0071357     | cellular response to type I interferon               | 17               | 9.65E-10 | 1.06E-07 |
| GO:0071222     | cellular response to lipopolysaccharide              | 29               | 9.93E-10 | 1.06E-07 |
| GO:0019730     | antimicrobial humoral response                       | 21               | 2.19E-09 | 2.29E-07 |
| GO:0032479     | regulation of type I interferon production           | 19               | 3.55E-09 | 3.56E-07 |
| GO:0032606     | type I interferon production                         | 19               | 3.55E-09 | 3.56E-07 |
| GO:0060337     | type I interferon signaling pathway                  | 16               | 5.12E-09 | 5.02E-07 |

|            |                                                                         |    |          |          |
|------------|-------------------------------------------------------------------------|----|----------|----------|
| GO:1902850 | microtubule cytoskeleton organization involved in mitosis               | 23 | 1.23E-08 | 1.18E-06 |
| GO:0060759 | regulation of response to cytokine stimulus                             | 24 | 1.65E-08 | 1.56E-06 |
| GO:0002697 | regulation of immune effector process                                   | 37 | 1.86E-08 | 1.71E-06 |
| GO:0001959 | regulation of cytokine-mediated signaling pathway                       | 23 | 1.97E-08 | 1.78E-06 |
| GO:0050727 | regulation of inflammatory response                                     | 39 | 2.04E-08 | 1.81E-06 |
| GO:0045088 | regulation of innate immune response                                    | 28 | 2.42E-08 | 2.11E-06 |
| GO:0032481 | positive regulation of type I interferon production                     | 14 | 2.68E-08 | 2.29E-06 |
| GO:0010965 | regulation of mitotic sister chromatid separation                       | 17 | 4.54E-08 | 3.82E-06 |
| GO:0045824 | negative regulation of innate immune response                           | 15 | 5.65E-08 | 4.67E-06 |
| GO:0002683 | negative regulation of immune system process                            | 40 | 6.23E-08 | 5.06E-06 |
| GO:0042742 | defense response to bacterium                                           | 36 | 7.11E-08 | 5.66E-06 |
| GO:0051306 | mitotic sister chromatid separation                                     | 17 | 7.21E-08 | 5.66E-06 |
| GO:0043122 | regulation of I-kappaB kinase/NF-kappaB signaling                       | 28 | 8.92E-08 | 6.85E-06 |
| GO:0044772 | mitotic cell cycle phase transition                                     | 41 | 9.02E-08 | 6.85E-06 |
| GO:0050729 | positive regulation of inflammatory response                            | 21 | 9.65E-08 | 7.21E-06 |
| GO:0031348 | negative regulation of defense response                                 | 29 | 1.00E-07 | 7.36E-06 |
| GO:0030071 | regulation of mitotic metaphase/anaphase transition                     | 16 | 1.09E-07 | 7.88E-06 |
| GO:0061844 | antimicrobial humoral immune response mediated by antimicrobial peptide | 15 | 1.15E-07 | 8.17E-06 |
| GO:0033046 | negative regulation of sister chromatid segregation                     | 12 | 1.35E-07 | 9.24E-06 |
| GO:0033048 | negative regulation of mitotic sister chromatid segregation             | 12 | 1.35E-07 | 9.24E-06 |
| GO:2000816 | negative regulation of mitotic sister chromatid separation              | 12 | 1.35E-07 | 9.24E-06 |
| GO:0033045 | regulation of sister chromatid segregation                              | 17 | 1.72E-07 | 1.13E-05 |
| GO:0007091 | metaphase/anaphase transition of mitotic cell cycle                     | 16 | 1.73E-07 | 1.13E-05 |
| GO:1902099 | regulation of metaphase/anaphase transition of cell cycle               | 16 | 1.73E-07 | 1.13E-05 |
| GO:0007052 | mitotic spindle organization                                            | 19 | 1.87E-07 | 1.20E-05 |
| GO:0051985 | negative regulation of chromosome segregation                           | 12 | 2.13E-07 | 1.34E-05 |
| GO:1905819 | negative regulation of chromosome separation                            | 12 | 2.13E-07 | 1.34E-05 |
| GO:1901987 | regulation of cell cycle phase transition                               | 39 | 2.23E-07 | 1.38E-05 |
| GO:0033044 | regulation of chromosome organization                                   | 27 | 2.49E-07 | 1.53E-05 |
| GO:0044784 | metaphase/anaphase transition of cell cycle                             | 16 | 2.69E-07 | 1.63E-05 |
| GO:0006260 | DNA replication                                                         | 29 | 2.93E-07 | 1.74E-05 |
| GO:0043616 | keratinocyte proliferation                                              | 12 | 3.29E-07 | 1.94E-05 |
| GO:0007249 | I-kappaB kinase/NF-kappaB signaling                                     | 29 | 3.39E-07 | 1.97E-05 |
| GO:0007094 | mitotic spindle assembly checkpoint                                     | 11 | 3.79E-07 | 2.12E-05 |
| GO:0071173 | spindle assembly checkpoint signaling                                   | 11 | 3.79E-07 | 2.12E-05 |
| GO:0071174 | mitotic spindle checkpoint signaling                                    | 11 | 3.79E-07 | 2.12E-05 |
| GO:0033047 | regulation of mitotic sister chromatid segregation                      | 12 | 4.06E-07 | 2.22E-05 |

|            |                                                                              |    |          |          |
|------------|------------------------------------------------------------------------------|----|----------|----------|
| GO:0045839 | negative regulation of mitotic nuclear                                       | 12 | 4.06E-07 | 2.22E-05 |
| GO:0034341 | response to interferon-gamma                                                 | 19 | 4.22E-07 | 2.29E-05 |
| GO:0031577 | spindle checkpoint signaling                                                 | 11 | 4.79E-07 | 2.56E-05 |
| GO:0032608 | interferon-beta production                                                   | 12 | 4.98E-07 | 2.60E-05 |
| GO:0032648 | regulation of interferon-beta production                                     | 12 | 4.98E-07 | 2.60E-05 |
| GO:0002832 | negative regulation of response to biotic stimulus                           | 17 | 5.66E-07 | 2.93E-05 |
| GO:0045841 | negative regulation of mitotic metaphase/anaphase transition                 | 11 | 6.02E-07 | 3.08E-05 |
| GO:0071621 | granulocyte chemotaxis                                                       | 18 | 6.28E-07 | 3.18E-05 |
| GO:0032102 | negative regulation of response to external stimulus                         | 37 | 6.49E-07 | 3.23E-05 |
| GO:0051383 | kinetochore organization                                                     | 8  | 6.52E-07 | 3.23E-05 |
| GO:0002221 | pattern recognition receptor signaling pathway                               | 22 | 6.60E-07 | 3.24E-05 |
| GO:0002833 | positive regulation of response to biotic stimulus                           | 22 | 7.24E-07 | 3.49E-05 |
| GO:0002718 | regulation of cytokine production involved in immune response                | 17 | 7.25E-07 | 3.49E-05 |
| GO:0002367 | cytokine production involved in immune response                              | 17 | 9.24E-07 | 4.39E-05 |
| GO:1902100 | negative regulation of metaphase/anaphase transition of cell cycle           | 11 | 9.34E-07 | 4.40E-05 |
| GO:1901990 | regulation of mitotic cell cycle phase transition                            | 32 | 9.56E-07 | 4.46E-05 |
| GO:0035456 | response to interferon-beta                                                  | 9  | 9.96E-07 | 4.60E-05 |
| GO:0007051 | spindle organization                                                         | 22 | 1.35E-06 | 6.17E-05 |
| GO:0071347 | cellular response to interleukin-1                                           | 16 | 1.52E-06 | 6.89E-05 |
| GO:0051784 | negative regulation of nuclear division                                      | 12 | 1.55E-06 | 6.95E-05 |
| GO:0008608 | attachment of spindle microtubules to kinetochore                            | 10 | 1.70E-06 | 7.55E-05 |
| GO:0007093 | mitotic cell cycle checkpoint signaling                                      | 18 | 2.09E-06 | 9.22E-05 |
| GO:0002700 | regulation of production of molecular mediator of immune response            | 21 | 2.52E-06 | 0.00011  |
| GO:0097530 | granulocyte migration                                                        | 19 | 2.72E-06 | 0.00012  |
| GO:0018149 | peptide cross-linking                                                        | 9  | 2.95E-06 | 0.00013  |
| GO:0071706 | tumor necrosis factor superfamily cytokine production                        | 21 | 2.99E-06 | 0.00013  |
| GO:1903555 | regulation of tumor necrosis factor superfamily cytokine production          | 21 | 2.99E-06 | 0.00013  |
| GO:0010950 | positive regulation of endopeptidase activity                                | 20 | 3.04E-06 | 0.00013  |
| GO:0032760 | positive regulation of tumor necrosis factor production                      | 15 | 3.61E-06 | 0.00015  |
| GO:0007159 | leukocyte cell-cell adhesion                                                 | 34 | 3.80E-06 | 0.00016  |
| GO:0030593 | neutrophil chemotaxis                                                        | 15 | 4.07E-06 | 0.00017  |
| GO:0002699 | positive regulation of immune effector process                               | 25 | 5.33E-06 | 0.00021  |
| GO:0006275 | regulation of DNA replication                                                | 17 | 5.35E-06 | 0.00021  |
| GO:1903557 | positive regulation of tumor necrosis factor superfamily cytokine production | 15 | 5.79E-06 | 0.00023  |
| GO:0032728 | positive regulation of interferon-beta production                            | 9  | 6.05E-06 | 0.00024  |
| GO:0010466 | negative regulation of peptidase activity                                    | 25 | 6.10E-06 | 0.00024  |

|            |                                                                        |    |          |         |
|------------|------------------------------------------------------------------------|----|----------|---------|
| GO:2001251 | negative regulation of chromosome organization                         | 14 | 6.71E-06 | 0.00026 |
| GO:0032640 | tumor necrosis factor production                                       | 20 | 7.15E-06 | 0.00027 |
| GO:0032680 | regulation of tumor necrosis factor                                    | 20 | 7.15E-06 | 0.00027 |
| GO:0061082 | myeloid leukocyte cytokine production                                  | 10 | 7.31E-06 | 0.00028 |
| GO:0046637 | regulation of alpha-beta T cell differentiation                        | 12 | 7.77E-06 | 0.00029 |
| GO:0000075 | cell cycle checkpoint signaling                                        | 20 | 8.41E-06 | 0.00031 |
| GO:0010951 | negative regulation of endopeptidase activity                          | 24 | 9.02E-06 | 0.00033 |
| GO:0050863 | regulation of T cell activation                                        | 31 | 9.37E-06 | 0.00034 |
| GO:0060338 | regulation of type I interferon-mediated signaling pathway             | 9  | 9.39E-06 | 0.00034 |
| GO:0032731 | positive regulation of interleukin-1 beta production                   | 11 | 1.02E-05 | 0.00037 |
| GO:1990266 | neutrophil migration                                                   | 16 | 1.23E-05 | 0.00044 |
| GO:0050830 | defense response to Gram-positive                                      | 15 | 1.54E-05 | 0.00055 |
| GO:0010952 | positive regulation of peptidase activity                              | 20 | 1.58E-05 | 0.00055 |
| GO:0002720 | positive regulation of cytokine production involved in immune response | 12 | 1.79E-05 | 0.00062 |
| GO:1903046 | meiotic cell cycle process                                             | 21 | 1.79E-05 | 0.00062 |
| GO:0045861 | negative regulation of proteolysis                                     | 29 | 1.83E-05 | 0.00063 |
| GO:0097193 | intrinsic apoptotic signaling pathway                                  | 26 | 1.84E-05 | 0.00063 |
| GO:0044771 | meiotic cell cycle phase transition                                    | 5  | 1.98E-05 | 0.00067 |
| GO:0051988 | regulation of attachment of spindle microtubules to kinetochore        | 6  | 2.30E-05 | 0.00077 |
| GO:0006959 | humoral immune response                                                | 27 | 2.33E-05 | 0.00078 |
| GO:0051092 | positive regulation of NF-kappaB transcription factor activity         | 17 | 2.80E-05 | 0.00093 |
| GO:0032722 | positive regulation of chemokine production                            | 11 | 2.87E-05 | 0.00095 |
| GO:0070269 | pyroptosis                                                             | 7  | 2.96E-05 | 0.00097 |
| GO:0032611 | interleukin-1 beta production                                          | 14 | 3.22E-05 | 0.00104 |
| GO:0032651 | regulation of interleukin-1 beta production                            | 14 | 3.22E-05 | 0.00104 |
| GO:0070555 | response to interleukin-1                                              | 16 | 3.41E-05 | 0.00109 |
| GO:0032642 | regulation of chemokine production                                     | 13 | 3.58E-05 | 0.00114 |
| GO:0030595 | leukocyte chemotaxis                                                   | 22 | 3.80E-05 | 0.0012  |
| GO:0046631 | alpha-beta T cell activation                                           | 18 | 3.95E-05 | 0.00124 |
| GO:0032602 | chemokine production                                                   | 13 | 3.99E-05 | 0.00124 |
| GO:0033260 | nuclear DNA replication                                                | 8  | 4.09E-05 | 0.00127 |
| GO:0097529 | myeloid leukocyte migration                                            | 22 | 4.31E-05 | 0.00133 |
| GO:0060339 | negative regulation of type I interferon-mediated signaling pathway    | 6  | 4.51E-05 | 0.00138 |
| GO:0046634 | regulation of alpha-beta T cell activation                             | 14 | 4.80E-05 | 0.00145 |
| GO:0045089 | positive regulation of innate immune response                          | 16 | 4.81E-05 | 0.00145 |
| GO:0097421 | liver regeneration                                                     | 7  | 4.89E-05 | 0.00146 |
| GO:0032732 | positive regulation of interleukin-1                                   | 11 | 4.89E-05 | 0.00146 |
| GO:0140013 | meiotic nuclear division                                               | 19 | 5.19E-05 | 0.00154 |
| GO:0051346 | negative regulation of hydrolase activity                              | 29 | 5.30E-05 | 0.00156 |
| GO:0022407 | regulation of cell-cell adhesion                                       | 35 | 5.38E-05 | 0.00158 |
| GO:0071900 | regulation of protein serine/threonine kinase activity                 | 30 | 6.08E-05 | 0.00175 |
| GO:0042454 | ribonucleoside catabolic process                                       | 6  | 6.13E-05 | 0.00175 |
| GO:0071605 | monocyte chemotactic protein-1 production                              | 6  | 6.13E-05 | 0.00175 |
| GO:0071637 | regulation of monocyte chemotactic protein-1 production                | 6  | 6.13E-05 | 0.00175 |

|            |                                                                                          |    |          |         |
|------------|------------------------------------------------------------------------------------------|----|----------|---------|
| GO:0071346 | cellular response to interferon-gamma                                                    | 14 | 6.39E-05 | 0.0018  |
| GO:0002702 | positive regulation of production of molecular mediator of immune response               | 15 | 6.39E-05 | 0.0018  |
| GO:1903037 | regulation of leukocyte cell-cell adhesion                                               | 29 | 6.41E-05 | 0.0018  |
| GO:0051321 | meiotic cell cycle                                                                       | 24 | 6.73E-05 | 0.00188 |
| GO:0051231 | spindle elongation                                                                       | 5  | 7.87E-05 | 0.00215 |
| GO:0031100 | animal organ regeneration                                                                | 10 | 7.95E-05 | 0.00215 |
| GO:0032613 | interleukin-10 production                                                                | 10 | 7.95E-05 | 0.00215 |
| GO:0032653 | regulation of interleukin-10 production                                                  | 10 | 7.95E-05 | 0.00215 |
| GO:0060760 | positive regulation of response to cytokine stimulus                                     | 10 | 7.95E-05 | 0.00215 |
| GO:2000116 | regulation of cysteine-type endopeptidase activity                                       | 21 | 8.18E-05 | 0.00219 |
| GO:0032069 | regulation of nuclease activity                                                          | 6  | 8.19E-05 | 0.00219 |
| GO:0044786 | cell cycle DNA replication                                                               | 8  | 8.73E-05 | 0.00231 |
| GO:0050691 | regulation of defense response to virus by host                                          | 8  | 8.73E-05 | 0.00231 |
| GO:0002698 | negative regulation of immune effector process                                           | 14 | 9.21E-05 | 0.00242 |
| GO:0002274 | myeloid leukocyte activation                                                             | 21 | 9.23E-05 | 0.00242 |
| GO:0006066 | alcohol metabolic process                                                                | 28 | 9.82E-05 | 0.00255 |
| GO:0070661 | leukocyte proliferation                                                                  | 27 | 9.84E-05 | 0.00255 |
| GO:0002224 | toll-like receptor signaling pathway                                                     | 14 | 0.0001   | 0.00259 |
| GO:0000302 | response to reactive oxygen species                                                      | 19 | 0.0001   | 0.00261 |
| GO:0009620 | response to fungus                                                                       | 10 | 0.0001   | 0.00263 |
| GO:0050670 | regulation of lymphocyte proliferation                                                   | 21 | 0.0001   | 0.00263 |
| GO:1903039 | positive regulation of leukocyte cell-cell adhesion                                      | 23 | 0.00011  | 0.00265 |
| GO:0032943 | mononuclear cell proliferation                                                           | 25 | 0.00011  | 0.00266 |
| GO:0010838 | positive regulation of keratinocyte                                                      | 5  | 0.00011  | 0.00283 |
| GO:0071639 | positive regulation of monocyte chemotactic protein-1 production                         | 5  | 0.00011  | 0.00283 |
| GO:1904874 | positive regulation of telomerase RNA localization to Cajal body                         | 5  | 0.00011  | 0.00283 |
| GO:0043123 | positive regulation of I-kappaB kinase/NF-kappaB signaling                               | 18 | 0.00012  | 0.00285 |
| GO:0007143 | female meiotic nuclear division                                                          | 7  | 0.00012  | 0.00289 |
| GO:0009394 | 2'-deoxyribonucleotide metabolic process                                                 | 8  | 0.00012  | 0.00298 |
| GO:0045862 | positive regulation of proteolysis                                                       | 28 | 0.00012  | 0.00298 |
| GO:0044839 | cell cycle G2/M phase transition                                                         | 16 | 0.00012  | 0.003   |
| GO:0001836 | release of cytochrome c from mitochondria                                                | 9  | 0.00013  | 0.00303 |
| GO:0043370 | regulation of CD4-positive, alpha-beta T cell differentiation                            | 9  | 0.00013  | 0.00303 |
| GO:0032944 | regulation of mononuclear cell proliferation                                             | 21 | 0.00013  | 0.00311 |
| GO:1903706 | regulation of hemopoiesis                                                                | 30 | 0.00013  | 0.00318 |
| GO:1902105 | regulation of leukocyte differentiation                                                  | 25 | 0.00014  | 0.0032  |
| GO:0010948 | negative regulation of cell cycle process                                                | 25 | 0.00014  | 0.00334 |
| GO:0061081 | positive regulation of myeloid leukocyte cytokine production involved in immune response | 7  | 0.00014  | 0.00334 |
| GO:0009262 | deoxyribonucleotide metabolic process                                                    | 8  | 0.00015  | 0.00334 |
| GO:0019692 | deoxyribose phosphate metabolic process                                                  | 8  | 0.00015  | 0.00334 |
| GO:0060326 | cell chemotaxis                                                                          | 25 | 0.00015  | 0.00345 |
| GO:0051225 | spindle assembly                                                                         | 14 | 0.00015  | 0.00352 |

|            |                                                                         |    |         |         |
|------------|-------------------------------------------------------------------------|----|---------|---------|
| GO:0045930 | negative regulation of mitotic cell cycle                               | 21 | 0.00016 | 0.00353 |
| GO:0045931 | positive regulation of mitotic cell cycle                               | 14 | 0.00017 | 0.00377 |
| GO:0001961 | positive regulation of cytokine-mediated signaling pathway              | 9  | 0.00017 | 0.00377 |
| GO:0051310 | metaphase plate congression                                             | 10 | 0.00017 | 0.00379 |
| GO:0010389 | regulation of G2/M transition of mitotic cell cycle                     | 12 | 0.00017 | 0.0038  |
| GO:0022409 | positive regulation of cell-cell adhesion                               | 25 | 0.00017 | 0.00385 |
| GO:0051984 | positive regulation of chromosome segregation                           | 6  | 0.00018 | 0.00391 |
| GO:0032612 | interleukin-1 production                                                | 14 | 0.00018 | 0.00396 |
| GO:0032652 | regulation of interleukin-1 production                                  | 14 | 0.00018 | 0.00396 |
| GO:0042542 | response to hydrogen peroxide                                           | 14 | 0.00018 | 0.00396 |
| GO:0046651 | lymphocyte proliferation                                                | 24 | 0.00019 | 0.00412 |
| GO:0043903 | regulation of biological process involved in symbiotic interaction      | 9  | 0.00019 | 0.00412 |
| GO:0051785 | positive regulation of nuclear division                                 | 9  | 0.00019 | 0.00412 |
| GO:0006575 | cellular modified amino acid metabolic process                          | 17 | 0.0002  | 0.0042  |
| GO:0070663 | regulation of leukocyte proliferation                                   | 22 | 0.0002  | 0.00431 |
| GO:0050870 | positive regulation of T cell activation                                | 21 | 0.00021 | 0.00435 |
| GO:0009119 | ribonucleoside metabolic process                                        | 7  | 0.00021 | 0.00444 |
| GO:0002886 | regulation of myeloid leukocyte mediated immunity                       | 9  | 0.00022 | 0.0046  |
| GO:0009164 | nucleoside catabolic process                                            | 6  | 0.00022 | 0.00463 |
| GO:0000079 | regulation of cyclin-dependent protein serine/threonine kinase activity | 13 | 0.00023 | 0.00463 |
| GO:0046632 | alpha-beta T cell differentiation                                       | 13 | 0.00023 | 0.00463 |
| GO:0071887 | leukocyte apoptotic process                                             | 13 | 0.00023 | 0.00463 |
| GO:1901988 | negative regulation of cell cycle phase transition                      | 22 | 0.00024 | 0.00486 |
| GO:0050688 | regulation of defense response to virus                                 | 10 | 0.00024 | 0.00491 |
| GO:0048144 | fibroblast proliferation                                                | 12 | 0.00025 | 0.00506 |
| GO:0010934 | macrophage cytokine production                                          | 7  | 0.00025 | 0.00509 |
| GO:0010935 | regulation of macrophage cytokine                                       | 7  | 0.00025 | 0.00509 |
| GO:0070665 | positive regulation of leukocyte proliferation                          | 16 | 0.00026 | 0.00512 |
| GO:0001960 | negative regulation of cytokine-mediated signaling pathway              | 11 | 0.00027 | 0.00529 |
| GO:0050000 | chromosome localization                                                 | 11 | 0.00027 | 0.00529 |
| GO:0002696 | positive regulation of leukocyte activation                             | 31 | 0.00027 | 0.00532 |
| GO:0061436 | establishment of skin barrier                                           | 6  | 0.00028 | 0.00549 |
| GO:1905820 | positive regulation of chromosome                                       | 6  | 0.00028 | 0.00549 |
| GO:1904029 | regulation of cyclin-dependent protein kinase activity                  | 13 | 0.00029 | 0.00566 |
| GO:0033033 | negative regulation of myeloid cell apoptotic process                   | 5  | 0.0003  | 0.00579 |
| GO:0051382 | kinetochore assembly                                                    | 5  | 0.0003  | 0.00579 |
| GO:1904872 | regulation of telomerase RNA localization to Cajal body                 | 5  | 0.0003  | 0.00579 |
| GO:0010971 | positive regulation of G2/M transition of mitotic cell cycle            | 6  | 0.00035 | 0.00665 |
| GO:0043124 | negative regulation of I-kappaB kinase/NF-kappaB signaling              | 8  | 0.00036 | 0.00684 |
| GO:0050900 | leukocyte migration                                                     | 28 | 0.00038 | 0.00716 |

|            |                                                             |    |         |         |
|------------|-------------------------------------------------------------|----|---------|---------|
| GO:0008637 | apoptotic mitochondrial changes                             | 12 | 0.00039 | 0.00729 |
| GO:2000106 | regulation of leukocyte apoptotic process                   | 11 | 0.00039 | 0.00729 |
| GO:0051797 | regulation of hair follicle development                     | 5  | 0.0004  | 0.00729 |
| GO:0090670 | RNA localization to Cajal body                              | 5  | 0.0004  | 0.00729 |
| GO:0090671 | telomerase RNA localization to Cajal body                   | 5  | 0.0004  | 0.00729 |
| GO:0090672 | telomerase RNA localization                                 | 5  | 0.0004  | 0.00729 |
| GO:0090685 | RNA localization to nucleus                                 | 5  | 0.0004  | 0.00729 |
| GO:0039530 | MDA-5 signaling pathway                                     | 4  | 0.0004  | 0.00729 |
| GO:0044848 | biological phase                                            | 4  | 0.0004  | 0.00729 |
| GO:0051256 | mitotic spindle midzone assembly                            | 4  | 0.0004  | 0.00729 |
| GO:0090085 | regulation of protein deubiquitination                      | 4  | 0.0004  | 0.00729 |
| GO:2000514 | regulation of CD4-positive, alpha-beta T cell activation    | 10 | 0.00041 | 0.00751 |
| GO:0032607 | interferon-alpha production                                 | 6  | 0.00042 | 0.00763 |
| GO:0032647 | regulation of interferon-alpha production                   | 6  | 0.00042 | 0.00763 |
| GO:0045619 | regulation of lymphocyte differentiation                    | 18 | 0.00043 | 0.0077  |
| GO:0060761 | negative regulation of response to cytokine stimulus        | 11 | 0.00043 | 0.00771 |
| GO:0000086 | G2/M transition of mitotic cell cycle                       | 14 | 0.00046 | 0.00811 |
| GO:0034605 | cellular response to heat                                   | 9  | 0.00046 | 0.00811 |
| GO:1902749 | regulation of cell cycle G2/M phase                         | 12 | 0.00046 | 0.00813 |
| GO:1901136 | carbohydrate derivative catabolic process                   | 16 | 0.00046 | 0.00813 |
| GO:0006690 | icosanoid metabolic process                                 | 13 | 0.00047 | 0.00819 |
| GO:0046638 | positive regulation of alpha-beta T cell differentiation    | 8  | 0.00047 | 0.00819 |
| GO:1901991 | negative regulation of mitotic cell cycle phase transition  | 17 | 0.00048 | 0.0083  |
| GO:0032733 | positive regulation of interleukin-10                       | 7  | 0.00049 | 0.00848 |
| GO:2001056 | positive regulation of cysteine-type endopeptidase activity | 14 | 0.00049 | 0.00848 |
| GO:0050867 | positive regulation of cell activation                      | 31 | 0.00051 | 0.00869 |
| GO:0046394 | carboxylic acid biosynthetic process                        | 24 | 0.00051 | 0.00869 |
| GO:0035455 | response to interferon-alpha                                | 5  | 0.00051 | 0.00869 |
| GO:0071243 | cellular response to arsenic-containing substance           | 5  | 0.00051 | 0.00869 |
| GO:0070498 | interleukin-1-mediated signaling pathway                    | 6  | 0.00051 | 0.00869 |
| GO:0009636 | response to toxic substance                                 | 20 | 0.00052 | 0.00869 |
| GO:0002275 | myeloid cell activation involved in immune response         | 11 | 0.00052 | 0.00869 |
| GO:0044403 | biological process involved in symbiotic interaction        | 23 | 0.00052 | 0.00869 |
| GO:0042572 | retinol metabolic process                                   | 8  | 0.00053 | 0.00893 |
| GO:0016053 | organic acid biosynthetic process                           | 24 | 0.00055 | 0.00923 |
| GO:0045580 | regulation of T cell differentiation                        | 16 | 0.00056 | 0.00925 |
| GO:0051303 | establishment of chromosome localization                    | 10 | 0.00056 | 0.00926 |
| GO:0034142 | toll-like receptor 4 signaling pathway                      | 7  | 0.00057 | 0.00942 |
| GO:0000022 | mitotic spindle elongation                                  | 4  | 0.00058 | 0.00959 |
| GO:0002819 | regulation of adaptive immune response                      | 17 | 0.0006  | 0.00986 |
| GO:0050671 | positive regulation of lymphocyte                           | 14 | 0.0006  | 0.00988 |
| GO:1990868 | response to chemokine                                       | 11 | 0.00062 | 0.0099  |
| GO:1990869 | cellular response to chemokine                              | 11 | 0.00062 | 0.0099  |
| GO:0002230 | positive regulation of defense response to virus by host    | 6  | 0.00062 | 0.0099  |
| GO:0033561 | regulation of water loss via skin                           | 6  | 0.00062 | 0.0099  |

|            |                                                                                  |    |         |         |
|------------|----------------------------------------------------------------------------------|----|---------|---------|
| GO:0034656 | nucleobase-containing small molecule catabolic process                           | 6  | 0.00062 | 0.0099  |
| GO:1902751 | positive regulation of cell cycle G2/M phase transition                          | 6  | 0.00062 | 0.0099  |
| GO:1903131 | mononuclear cell differentiation                                                 | 31 | 0.00063 | 0.00999 |
| GO:0002526 | acute inflammatory response                                                      | 12 | 0.00064 | 0.0101  |
| GO:0045109 | intermediate filament organization                                               | 9  | 0.00064 | 0.0101  |
| GO:0045622 | regulation of T-helper cell differentiation                                      | 7  | 0.00066 | 0.01044 |
| GO:0006979 | response to oxidative stress                                                     | 29 | 0.00068 | 0.0107  |
| GO:0009116 | nucleoside metabolic process                                                     | 8  | 0.00068 | 0.0107  |
| GO:0033559 | unsaturated fatty acid metabolic process                                         | 12 | 0.00069 | 0.0107  |
| GO:0042303 | molting cycle                                                                    | 12 | 0.00069 | 0.0107  |
| GO:0042633 | hair cycle                                                                       | 12 | 0.00069 | 0.0107  |
| GO:0006261 | DNA-templated DNA replication                                                    | 15 | 0.00073 | 0.01127 |
| GO:1901992 | positive regulation of mitotic cell cycle phase transition                       | 11 | 0.00073 | 0.01127 |
| GO:0034508 | centromere complex assembly                                                      | 6  | 0.00074 | 0.01127 |
| GO:0043304 | regulation of mast cell degranulation                                            | 6  | 0.00074 | 0.01127 |
| GO:0032946 | positive regulation of mononuclear cell proliferation                            | 14 | 0.00074 | 0.01127 |
| GO:2000377 | regulation of reactive oxygen species metabolic process                          | 14 | 0.00074 | 0.01127 |
| GO:0098586 | cellular response to virus                                                       | 12 | 0.00074 | 0.01131 |
| GO:0045840 | positive regulation of mitotic nuclear division                                  | 7  | 0.00076 | 0.01154 |
| GO:0090329 | regulation of DNA-templated DNA                                                  | 8  | 0.00077 | 0.01165 |
| GO:0002548 | monocyte chemotaxis                                                              | 9  | 0.00079 | 0.01184 |
| GO:0051701 | biological process involved in interaction with host                             | 17 | 0.0008  | 0.01194 |
| GO:0007144 | female meiosis I                                                                 | 4  | 0.00082 | 0.01208 |
| GO:0070486 | leukocyte aggregation                                                            | 4  | 0.00082 | 0.01208 |
| GO:1900262 | regulation of DNA-directed DNA polymerase activity                               | 4  | 0.00082 | 0.01208 |
| GO:1900264 | positive regulation of DNA-directed DNA polymerase activity                      | 4  | 0.00082 | 0.01208 |
| GO:0051767 | nitric-oxide synthase biosynthetic process                                       | 5  | 0.00082 | 0.01208 |
| GO:0051769 | regulation of nitric-oxide synthase biosynthetic process                         | 5  | 0.00082 | 0.01208 |
| GO:0050673 | epithelial cell proliferation                                                    | 31 | 0.00082 | 0.01208 |
| GO:0033003 | regulation of mast cell activation                                               | 7  | 0.00088 | 0.01278 |
| GO:0033032 | regulation of myeloid cell apoptotic process                                     | 6  | 0.00088 | 0.01278 |
| GO:0043281 | regulation of cysteine-type endopeptidase activity involved in apoptotic process | 17 | 0.00089 | 0.01288 |
| GO:0001523 | retinoid metabolic process                                                       | 10 | 0.00089 | 0.01288 |
| GO:0048145 | regulation of fibroblast proliferation                                           | 10 | 0.00089 | 0.01288 |
| GO:1900182 | positive regulation of protein localization to nucleus                           | 10 | 0.00089 | 0.01288 |
| GO:0032609 | interferon-gamma production                                                      | 12 | 0.00093 | 0.01337 |
| GO:0032649 | regulation of interferon-gamma production                                        | 12 | 0.00093 | 0.01337 |
| GO:0046635 | positive regulation of alpha-beta T cell activation                              | 9  | 0.00096 | 0.01377 |
| GO:0043367 | CD4-positive, alpha-beta T cell                                                  | 10 | 0.00098 | 0.01391 |
| GO:0001906 | cell killing                                                                     | 16 | 0.001   | 0.01413 |
| GO:0010837 | regulation of keratinocyte proliferation                                         | 7  | 0.001   | 0.01413 |
| GO:0031640 | killing of cells of another organism                                             | 7  | 0.001   | 0.01413 |



|            |                                                                                           |    |         |         |
|------------|-------------------------------------------------------------------------------------------|----|---------|---------|
| GO:0032401 | establishment of melanosome localization                                                  | 5  | 0.00102 | 0.01428 |
| GO:0032727 | positive regulation of interferon-alpha production                                        | 5  | 0.00102 | 0.01428 |
| GO:0033006 | regulation of mast cell activation involved in immune response                            | 6  | 0.00103 | 0.01439 |
| GO:0039528 | cytoplasmic pattern recognition receptor signaling pathway in response to virus           | 6  | 0.00103 | 0.01439 |
| GO:0090307 | mitotic spindle assembly                                                                  | 9  | 0.00107 | 0.01478 |
| GO:0045786 | negative regulation of cell cycle                                                         | 27 | 0.00107 | 0.01478 |
| GO:0006643 | membrane lipid metabolic process                                                          | 17 | 0.0011  | 0.01518 |
| GO:0007100 | mitotic centrosome separation                                                             | 4  | 0.00111 | 0.0152  |
| GO:0009158 | ribonucleoside monophosphate catabolic process                                            | 4  | 0.00111 | 0.0152  |
| GO:0051255 | spindle midzone assembly                                                                  | 4  | 0.00111 | 0.0152  |
| GO:1902969 | mitotic DNA replication                                                                   | 4  | 0.00111 | 0.0152  |
| GO:0051091 | positive regulation of DNA-binding transcription factor activity                          | 20 | 0.00112 | 0.0152  |
| GO:0002701 | negative regulation of production of molecular mediator of immune response                | 7  | 0.00114 | 0.01551 |
| GO:0010639 | negative regulation of organelle organization                                             | 25 | 0.00115 | 0.01556 |
| GO:1901989 | positive regulation of cell cycle phase transition                                        | 12 | 0.00116 | 0.01563 |
| GO:0016101 | diterpenoid metabolic process                                                             | 10 | 0.00116 | 0.01563 |
| GO:0070098 | chemokine-mediated signaling pathway                                                      | 10 | 0.00116 | 0.01563 |
| GO:0002719 | negative regulation of cytokine production involved in immune response                    | 6  | 0.00121 | 0.0161  |
| GO:0043372 | positive regulation of CD4-positive, alpha-beta T cell differentiation                    | 6  | 0.00121 | 0.0161  |
| GO:1901658 | glycosyl compound catabolic process                                                       | 6  | 0.00121 | 0.0161  |
| GO:0002755 | MyD88-dependent toll-like receptor signaling pathway                                      | 5  | 0.00125 | 0.01645 |
| GO:0035458 | cellular response to interferon-beta                                                      | 5  | 0.00125 | 0.01645 |
| GO:0051905 | establishment of pigment granule                                                          | 5  | 0.00125 | 0.01645 |
| GO:0060907 | positive regulation of macrophage cytokine production                                     | 5  | 0.00125 | 0.01645 |
| GO:0001942 | hair follicle development                                                                 | 10 | 0.00127 | 0.01664 |
| GO:0002444 | myeloid leukocyte mediated immunity                                                       | 11 | 0.00129 | 0.01681 |
| GO:0044409 | entry into host                                                                           | 14 | 0.00131 | 0.0171  |
| GO:0032635 | interleukin-6 production                                                                  | 15 | 0.00133 | 0.01722 |
| GO:0032675 | regulation of interleukin-6 production                                                    | 15 | 0.00133 | 0.01722 |
| GO:0043030 | regulation of macrophage activation                                                       | 8  | 0.00136 | 0.01755 |
| GO:0043280 | positive regulation of cysteine-type endopeptidase activity involved in apoptotic process | 12 | 0.00144 | 0.01853 |
| GO:0043300 | regulation of leukocyte degranulation                                                     | 7  | 0.00147 | 0.01871 |
| GO:0000212 | meiotic spindle organization                                                              | 4  | 0.00148 | 0.01871 |
| GO:0043455 | regulation of secondary metabolic process                                                 | 4  | 0.00148 | 0.01871 |
| GO:0048021 | regulation of melanin biosynthetic process                                                | 4  | 0.00148 | 0.01871 |
| GO:0048820 | hair follicle maturation                                                                  | 4  | 0.00148 | 0.01871 |
| GO:0051299 | centrosome separation                                                                     | 4  | 0.00148 | 0.01871 |
| GO:1900376 | regulation of secondary metabolite biosynthetic process                                   | 4  | 0.00148 | 0.01871 |
| GO:0042116 | macrophage activation                                                                     | 11 | 0.0015  | 0.01888 |
| GO:0071356 | cellular response to tumor necrosis factor                                                | 18 | 0.0015  | 0.01892 |

|            |                                                                                                                                         |    |         |         |
|------------|-----------------------------------------------------------------------------------------------------------------------------------------|----|---------|---------|
| GO:0031663 | lipopolysaccharide-mediated signaling pathway                                                                                           | 8  | 0.00151 | 0.01892 |
| GO:0032400 | melanosome localization                                                                                                                 | 5  | 0.00152 | 0.01897 |
| GO:0051446 | positive regulation of meiotic cell cycle                                                                                               | 5  | 0.00152 | 0.01897 |
| GO:0034612 | response to tumor necrosis factor                                                                                                       | 19 | 0.00156 | 0.01942 |
| GO:0051656 | establishment of organelle localization                                                                                                 | 28 | 0.00157 | 0.01955 |
| GO:0022404 | molting cycle process                                                                                                                   | 10 | 0.00163 | 0.02006 |
| GO:0022405 | hair cycle process                                                                                                                      | 10 | 0.00163 | 0.02006 |
| GO:0071897 | DNA biosynthetic process                                                                                                                | 16 | 0.00163 | 0.02006 |
| GO:0022616 | DNA strand elongation                                                                                                                   | 6  | 0.00163 | 0.0201  |
| GO:0042180 | cellular ketone metabolic process                                                                                                       | 17 | 0.00174 | 0.02128 |
| GO:0030217 | T cell differentiation                                                                                                                  | 21 | 0.00175 | 0.02129 |
| GO:0046683 | response to organophosphorus                                                                                                            | 12 | 0.00176 | 0.02129 |
| GO:0032088 | negative regulation of NF-kappaB transcription factor activity                                                                          | 10 | 0.00176 | 0.02129 |
| GO:0032465 | regulation of cytokinesis                                                                                                               | 10 | 0.00176 | 0.02129 |
| GO:0098773 | skin epidermis development                                                                                                              | 10 | 0.00176 | 0.02129 |
| GO:0006665 | sphingolipid metabolic process                                                                                                          | 14 | 0.00176 | 0.02129 |
| GO:0045785 | positive regulation of cell adhesion                                                                                                    | 30 | 0.00181 | 0.02184 |
| GO:0035821 | modulation of process of another organism                                                                                               | 5  | 0.00183 | 0.02184 |
| GO:0051875 | pigment granule localization                                                                                                            | 5  | 0.00183 | 0.02184 |
| GO:0060333 | interferon-gamma-mediated signaling pathway                                                                                             | 5  | 0.00183 | 0.02184 |
| GO:0002822 | regulation of adaptive immune response based on somatic recombination of immune receptors built from immunoglobulin superfamily domains | 15 | 0.00185 | 0.02198 |
| GO:0042129 | regulation of T cell proliferation                                                                                                      | 15 | 0.00185 | 0.02198 |
| GO:0042060 | wound healing                                                                                                                           | 28 | 0.00186 | 0.02198 |
| GO:0070227 | lymphocyte apoptotic process                                                                                                            | 9  | 0.00186 | 0.02198 |
| GO:0051251 | positive regulation of lymphocyte activation                                                                                            | 26 | 0.00187 | 0.02204 |
| GO:0009263 | deoxyribonucleotide biosynthetic process                                                                                                | 4  | 0.00192 | 0.02245 |
| GO:0009265 | 2'-deoxyribonucleotide biosynthetic process                                                                                             | 4  | 0.00192 | 0.02245 |
| GO:0046385 | deoxyribose phosphate biosynthetic process                                                                                              | 4  | 0.00192 | 0.02245 |
| GO:1901657 | glycosyl compound metabolic process                                                                                                     | 9  | 0.00203 | 0.02369 |
| GO:0002703 | regulation of leukocyte mediated immunity                                                                                               | 18 | 0.00208 | 0.02426 |
| GO:0006636 | unsaturated fatty acid biosynthetic process                                                                                             | 7  | 0.00209 | 0.02433 |
| GO:0033028 | myeloid cell apoptotic process                                                                                                          | 6  | 0.00216 | 0.02508 |
| GO:0006760 | folic acid-containing compound metabolic process                                                                                        | 5  | 0.00218 | 0.02515 |
| GO:0090200 | positive regulation of release of cytochrome c from mitochondria                                                                        | 5  | 0.00218 | 0.02515 |
| GO:0031638 | zymogen activation                                                                                                                      | 8  | 0.00225 | 0.02581 |
| GO:0045576 | mast cell activation                                                                                                                    | 8  | 0.00225 | 0.02581 |
| GO:0044282 | small molecule catabolic process                                                                                                        | 25 | 0.00229 | 0.02621 |
| GO:0035710 | CD4-positive, alpha-beta T cell activation                                                                                              | 11 | 0.0023  | 0.02621 |
| GO:1990748 | cellular detoxification                                                                                                                 | 11 | 0.0023  | 0.02621 |
| GO:0048146 | positive regulation of fibroblast proliferation                                                                                         | 7  | 0.00234 | 0.02655 |
| GO:0052372 | modulation by symbiont of entry into host                                                                                               | 7  | 0.00234 | 0.02655 |
| GO:0140694 | non-membrane-bounded organelle                                                                                                          | 25 | 0.00237 | 0.02687 |
| GO:0032755 | positive regulation of interleukin-6                                                                                                    | 10 | 0.0024  | 0.0271  |
| GO:0000910 | cytokinesis                                                                                                                             | 15 | 0.00241 | 0.02716 |
| GO:0042307 | positive regulation of protein import into nucleus                                                                                      | 6  | 0.00247 | 0.02776 |

|            |                                                                     |    |         |         |
|------------|---------------------------------------------------------------------|----|---------|---------|
| GO:0046718 | viral entry into host cell                                          | 13 | 0.00248 | 0.02783 |
| GO:0042634 | regulation of hair cycle                                            | 5  | 0.00258 | 0.02878 |
| GO:0001776 | leukocyte homeostasis                                               | 10 | 0.00258 | 0.02878 |
| GO:0002532 | production of molecular mediator involved in inflammatory response  | 10 | 0.00258 | 0.02878 |
| GO:0033674 | positive regulation of kinase activity                              | 30 | 0.00262 | 0.02905 |
| GO:0009410 | response to xenobiotic stimulus                                     | 27 | 0.00268 | 0.02967 |
| GO:0051090 | regulation of DNA-binding transcription factor activity             | 28 | 0.00272 | 0.0301  |
| GO:0006721 | terpenoid metabolic process                                         | 10 | 0.00278 | 0.03068 |
| GO:0051302 | regulation of cell division                                         | 15 | 0.00281 | 0.03084 |
| GO:0036297 | interstrand cross-link repair                                       | 6  | 0.00281 | 0.03084 |
| GO:0000281 | mitotic cytokinesis                                                 | 9  | 0.00283 | 0.03098 |
| GO:0002448 | mast cell mediated immunity                                         | 7  | 0.0029  | 0.03169 |
| GO:0071902 | positive regulation of protein serine/threonine kinase activity     | 17 | 0.00291 | 0.03171 |
| GO:0000723 | telomere maintenance                                                | 13 | 0.00295 | 0.03206 |
| GO:0008630 | intrinsic apoptotic signaling pathway in response to DNA damage     | 10 | 0.00299 | 0.03244 |
| GO:0090025 | regulation of monocyte chemotaxis                                   | 5  | 0.00303 | 0.03262 |
| GO:0009125 | nucleoside monophosphate catabolic                                  | 4  | 0.00305 | 0.03262 |
| GO:0046040 | IMP metabolic process                                               | 4  | 0.00305 | 0.03262 |
| GO:0051770 | positive regulation of nitric-oxide synthase biosynthetic process   | 4  | 0.00305 | 0.03262 |
| GO:0072567 | chemokine (C-X-C motif) ligand 2                                    | 4  | 0.00305 | 0.03262 |
| GO:2000341 | regulation of chemokine (C-X-C motif) ligand 2 production           | 4  | 0.00305 | 0.03262 |
| GO:0016485 | protein processing                                                  | 18 | 0.00309 | 0.03301 |
| GO:0061982 | meiosis I cell cycle process                                        | 12 | 0.00311 | 0.03313 |
| GO:0002685 | regulation of leukocyte migration                                   | 17 | 0.00318 | 0.03382 |
| GO:0050832 | defense response to fungus                                          | 7  | 0.00322 | 0.03412 |
| GO:0002440 | production of molecular mediator of immune response                 | 22 | 0.00332 | 0.03517 |
| GO:0006720 | isoprenoid metabolic process                                        | 11 | 0.00342 | 0.03613 |
| GO:0030098 | lymphocyte differentiation                                          | 26 | 0.0035  | 0.03685 |
| GO:0007080 | mitotic metaphase plate congression                                 | 7  | 0.00356 | 0.03733 |
| GO:0010332 | response to gamma radiation                                         | 7  | 0.00356 | 0.03733 |
| GO:0071548 | response to dexamethasone                                           | 6  | 0.00359 | 0.03759 |
| GO:0045860 | positive regulation of protein kinase activity                      | 26 | 0.00361 | 0.03769 |
| GO:0002283 | neutrophil activation involved in immune response                   | 4  | 0.00376 | 0.03862 |
| GO:0007076 | mitotic chromosome condensation                                     | 4  | 0.00376 | 0.03862 |
| GO:0009148 | pyrimidine nucleoside triphosphate biosynthetic process             | 4  | 0.00376 | 0.03862 |
| GO:0032695 | negative regulation of interleukin-12 production                    | 4  | 0.00376 | 0.03862 |
| GO:0060340 | positive regulation of type I interferon-mediated signaling pathway | 4  | 0.00376 | 0.03862 |
| GO:0097202 | activation of cysteine-type endopeptidase activity                  | 4  | 0.00376 | 0.03862 |
| GO:1901978 | positive regulation of cell cycle checkpoint                        | 4  | 0.00376 | 0.03862 |
| GO:0072593 | reactive oxygen species metabolic process                           | 17 | 0.00379 | 0.03887 |
| GO:0043462 | regulation of ATP-dependent activity                                | 8  | 0.00386 | 0.03939 |

|            |                                                                   |                  |          |          |
|------------|-------------------------------------------------------------------|------------------|----------|----------|
| GO:0071677 | positive regulation of mononuclear cell migration                 | 8                | 0.00386  | 0.03939  |
| GO:0045104 | intermediate filament cytoskeleton organization                   | 9                | 0.00386  | 0.03939  |
| GO:0007292 | female gamete generation                                          | 13               | 0.00388  | 0.03939  |
| GO:0097237 | cellular response to toxic substance                              | 11               | 0.00388  | 0.03939  |
| GO:0001889 | liver development                                                 | 12               | 0.00393  | 0.03981  |
| GO:0042102 | positive regulation of T cell proliferation                       | 10               | 0.00395  | 0.03993  |
| GO:2000316 | regulation of T-helper 17 type immune response                    | 5                | 0.00409  | 0.04122  |
| GO:0045103 | intermediate filament-based process                               | 9                | 0.00416  | 0.04177  |
| GO:0006672 | ceramide metabolic process                                        | 10               | 0.00423  | 0.04177  |
| GO:0002138 | retinoic acid biosynthetic process                                | 3                | 0.00423  | 0.04177  |
| GO:0002775 | antimicrobial peptide production                                  | 3                | 0.00423  | 0.04177  |
| GO:0009128 | purine nucleoside monophosphate catabolic process                 | 3                | 0.00423  | 0.04177  |
| GO:0009155 | purine deoxyribonucleotide catabolic process                      | 3                | 0.00423  | 0.04177  |
| GO:0009169 | purine ribonucleoside monophosphate catabolic process             | 3                | 0.00423  | 0.04177  |
| GO:0010496 | intercellular transport                                           | 3                | 0.00423  | 0.04177  |
| GO:0060075 | regulation of resting membrane potential                          | 3                | 0.00423  | 0.04177  |
| GO:0060368 | regulation of Fc receptor mediated stimulatory signaling pathway  | 3                | 0.00423  | 0.04177  |
| GO:0072330 | monocarboxylic acid biosynthetic process                          | 16               | 0.00425  | 0.0419   |
| GO:0042306 | regulation of protein import into nucleus                         | 7                | 0.00433  | 0.04245  |
| GO:0051653 | spindle localization                                              | 7                | 0.00433  | 0.04245  |
| GO:0034308 | primary alcohol metabolic process                                 | 10               | 0.00452  | 0.04421  |
| GO:2000516 | positive regulation of CD4-positive, alpha-beta T cell activation | 6                | 0.00453  | 0.04421  |
| GO:0051546 | keratinocyte migration                                            | 4                | 0.00457  | 0.04452  |
| GO:0061008 | hepaticobiliary system development                                | 12               | 0.00466  | 0.0453   |
| GO:0051054 | positive regulation of DNA metabolic process                      | 20               | 0.00468  | 0.0454   |
| GO:0006221 | pyrimidine nucleotide biosynthetic process                        | 5                | 0.00471  | 0.04544  |
| GO:0046685 | response to arsenic-containing substance                          | 5                | 0.00471  | 0.04544  |
| GO:0051642 | centrosome localization                                           | 5                | 0.00471  | 0.04544  |
| GO:0002753 | cytoplasmic pattern recognition receptor signaling pathway        | 7                | 0.00475  | 0.04578  |
| GO:0046822 | regulation of nucleocytoplasmic transport                         | 10               | 0.00482  | 0.04633  |
| GO:0010822 | positive regulation of mitochondrion organization                 | 8                | 0.00495  | 0.04743  |
| GO:0062197 | cellular response to chemical stress                              | 22               | 0.00504  | 0.04808  |
| GO:0044000 | movement in host                                                  | 14               | 0.00505  | 0.04808  |
| GO:0046006 | regulation of activated T cell proliferation                      | 6                | 0.00505  | 0.04808  |
| GO:0046596 | regulation of viral entry into host cell                          | 6                | 0.00505  | 0.04808  |
| GO:0046456 | icosanoid biosynthetic process                                    | 7                | 0.00521  | 0.04949  |
| GO:0070585 | protein localization to mitochondrion                             | 11               | 0.00525  | 0.04971  |
| <b>B</b>   | <b>GO-CC</b>                                                      |                  |          |          |
| ID         | Description                                                       | Count in geneset | pvalue   | p.adjust |
| GO:0001533 | cornified envelope                                                | 19               | 3.38E-14 | 1.75E-11 |
| GO:0034774 | secretory granule lumen                                           | 40               | 1.18E-12 | 2.51E-10 |
| GO:0060205 | cytoplasmic vesicle lumen                                         | 40               | 1.59E-12 | 2.51E-10 |
| GO:0031983 | vesicle lumen                                                     | 40               | 1.94E-12 | 2.51E-10 |
| GO:0005819 | spindle                                                           | 42               | 5.63E-10 | 5.82E-08 |
| GO:0035580 | specific granule lumen                                            | 13               | 1.20E-07 | 1.03E-05 |

|            |                                                    |                         |               |                 |
|------------|----------------------------------------------------|-------------------------|---------------|-----------------|
| GO:1904813 | ficolin-1-rich granule lumen                       | 18                      | 1.89E-07      | 1.39E-05        |
| GO:0072686 | mitotic spindle                                    | 22                      | 2.61E-07      | 1.69E-05        |
| GO:0000922 | spindle pole                                       | 20                      | 1.54E-06      | 8.85E-05        |
| GO:0098687 | chromosomal region                                 | 32                      | 3.42E-06      | 0.00018         |
| GO:0000793 | condensed chromosome                               | 25                      | 6.67E-06      | 0.00031         |
| GO:0000779 | condensed chromosome, centromeric                  | 19                      | 7.09E-06      | 0.00031         |
| GO:0042599 | lamellar body                                      | 6                       | 1.31E-05      | 0.00049         |
| GO:1904724 | tertiary granule lumen                             | 10                      | 1.34E-05      | 0.00049         |
| GO:0000775 | chromosome, centromeric region                     | 23                      | 1.44E-05      | 0.00049         |
| GO:0101002 | ficolin-1-rich granule                             | 19                      | 1.71E-05      | 0.00055         |
| GO:0000307 | cyclin-dependent protein kinase holoenzyme complex | 9                       | 3.93E-05      | 0.00119         |
| GO:0000776 | kinetochore                                        | 17                      | 4.17E-05      | 0.0012          |
| GO:0035578 | azurophil granule lumen                            | 12                      | 5.49E-05      | 0.00149         |
| GO:0030496 | midbody                                            | 19                      | 6.21E-05      | 0.0016          |
| GO:0042581 | specific granule                                   | 16                      | 0.00011       | 0.00263         |
| GO:0005874 | microtubule                                        | 32                      | 0.00013       | 0.00297         |
| GO:0000502 | proteasome complex                                 | 9                       | 0.00015       | 0.00338         |
| GO:0005876 | spindle microtubule                                | 11                      | 0.00016       | 0.00352         |
| GO:0045171 | intercellular bridge                               | 11                      | 0.0002        | 0.00415         |
| GO:0031617 | NMS complex                                        | 4                       | 0.00023       | 0.00458         |
| GO:1902554 | serine/threonine protein kinase complex            | 13                      | 0.00025       | 0.00475         |
| GO:0005775 | vacuolar lumen                                     | 16                      | 0.00032       | 0.00575         |
| GO:0000228 | nuclear chromosome                                 | 20                      | 0.00032       | 0.00575         |
| GO:1904090 | peptidase inhibitor complex                        | 4                       | 0.00035       | 0.00606         |
| GO:1905369 | endopeptidase complex                              | 10                      | 0.00043       | 0.00711         |
| GO:0005839 | proteasome core complex                            | 5                       | 0.00044       | 0.00711         |
| GO:0000940 | outer kinetochore                                  | 4                       | 0.00051       | 0.00805         |
| GO:0030665 | clathrin-coated vesicle membrane                   | 13                      | 0.00054       | 0.00814         |
| GO:0030669 | clathrin-coated endocytic vesicle membrane         | 9                       | 0.00069       | 0.01019         |
| GO:1902911 | protein kinase complex                             | 13                      | 0.00071       | 0.01022         |
| GO:0030136 | clathrin-coated vesicle                            | 17                      | 0.00085       | 0.01192         |
| GO:0051233 | spindle midzone                                    | 6                       | 0.00119       | 0.01619         |
| GO:0070820 | tertiary granule                                   | 14                      | 0.00137       | 0.01821         |
| GO:0005657 | replication fork                                   | 8                       | 0.0015        | 0.01939         |
| GO:0046930 | pore complex                                       | 5                       | 0.00158       | 0.0199          |
| GO:0005766 | primary lysosome                                   | 13                      | 0.00235       | 0.02823         |
| GO:0042582 | azurophil granule                                  | 13                      | 0.00235       | 0.02823         |
| GO:0061702 | inflammasome complex                               | 4                       | 0.0027        | 0.03176         |
| GO:0045334 | clathrin-coated endocytic vesicle                  | 9                       | 0.00335       | 0.03851         |
| GO:0034399 | nuclear periphery                                  | 12                      | 0.00379       | 0.04237         |
| GO:0070938 | contractile ring                                   | 3                       | 0.00385       | 0.04237         |
| GO:0030135 | coated vesicle                                     | 20                      | 0.00451       | 0.04859         |
| GO:0043596 | nuclear replication fork                           | 5                       | 0.00469       | 0.04948         |
| <b>C</b>   | <b>GO-MF</b>                                       |                         |               |                 |
| <b>ID</b>  | <b>Description</b>                                 | <b>Count in geneset</b> | <b>pvalue</b> | <b>p.adjust</b> |
| GO:0061134 | peptidase regulator activity                       | 27                      | 1.05E-07      | 8.52E-05        |
| GO:0004252 | serine-type endopeptidase activity                 | 21                      | 1.50E-06      | 0.00047         |
| GO:0008236 | serine-type peptidase activity                     | 22                      | 2.05E-06      | 0.00047         |
| GO:0061135 | endopeptidase regulator activity                   | 22                      | 2.44E-06      | 0.00047         |
| GO:0017171 | serine hydrolase activity                          | 22                      | 2.89E-06      | 0.00047         |
| GO:0030414 | peptidase inhibitor activity                       | 21                      | 4.80E-06      | 0.00065         |
| GO:0004866 | endopeptidase inhibitor activity                   | 20                      | 9.44E-06      | 0.00109         |
| GO:0004867 | serine-type endopeptidase inhibitor activity       | 14                      | 1.21E-05      | 0.00123         |

|            |                                                                              |                  |          |          |
|------------|------------------------------------------------------------------------------|------------------|----------|----------|
| GO:0002020 | protease binding                                                             | 16               | 4.70E-05 | 0.00424  |
| GO:0004175 | endopeptidase activity                                                       | 32               | 9.40E-05 | 0.00763  |
| GO:0004869 | cysteine-type endopeptidase inhibitor                                        | 9                | 0.00017  | 0.01285  |
| GO:0042379 | chemokine receptor binding                                                   | 10               | 0.00024  | 0.01607  |
| GO:0050786 | RAGE receptor binding                                                        | 4                | 0.00031  | 0.01888  |
| GO:0016229 | steroid dehydrogenase activity                                               | 7                | 0.00033  | 0.01888  |
| GO:0003725 | double-stranded RNA binding                                                  | 10               | 0.00042  | 0.02258  |
| GO:0004745 | NAD-retinol dehydrogenase activity                                           | 5                | 0.00048  | 0.02427  |
| GO:0035325 | Toll-like receptor binding                                                   | 4                | 0.00068  | 0.031    |
| GO:0016616 | oxidoreductase activity, acting on the CH-OH group of donors, NAD or NADP as | 13               | 0.00069  | 0.031    |
| GO:0008017 | microtubule binding                                                          | 21               | 0.00098  | 0.03947  |
| GO:0030295 | protein kinase activator activity                                            | 12               | 0.00099  | 0.03947  |
| GO:0005546 | phosphatidylinositol-4,5-bisphosphate                                        | 10               | 0.00102  | 0.03947  |
| GO:0019887 | protein kinase regulator activity                                            | 18               | 0.00107  | 0.03954  |
| GO:0015631 | tubulin binding                                                              | 26               | 0.00135  | 0.04573  |
| GO:0004857 | enzyme inhibitor activity                                                    | 27               | 0.00135  | 0.04573  |
| GO:0019209 | kinase activator activity                                                    | 12               | 0.00154  | 0.04991  |
| GO:0016614 | oxidoreductase activity, acting on CH-OH group of donors                     | 13               | 0.0016   | 0.04991  |
| <b>D</b>   | <b>KEGG</b>                                                                  |                  |          |          |
| ID         | Description                                                                  | Count in geneset | pvalue   | p.adjust |
| hsa05164   | Influenza A                                                                  | 30               | 3.25E-11 | 9.48E-09 |
| hsa04621   | NOD-like receptor signaling pathway                                          | 27               | 1.15E-08 | 1.68E-06 |
| hsa04110   | Cell cycle                                                                   | 20               | 2.63E-07 | 2.56E-05 |
| hsa04657   | IL-17 signaling pathway                                                      | 17               | 3.95E-07 | 2.61E-05 |
| hsa05169   | Epstein-Barr virus infection                                                 | 26               | 4.46E-07 | 2.61E-05 |
| hsa05162   | Measles                                                                      | 19               | 6.79E-06 | 0.00033  |
| hsa05160   | Hepatitis C                                                                  | 20               | 1.15E-05 | 0.00048  |
| hsa00480   | Glutathione metabolism                                                       | 10               | 0.00013  | 0.00484  |
| hsa04623   | Cytosolic DNA-sensing pathway                                                | 10               | 0.00031  | 0.01013  |
| hsa05134   | Legionellosis                                                                | 9                | 0.00065  | 0.0176   |
| hsa03050   | Proteasome                                                                   | 8                | 0.00066  | 0.0176   |
| hsa05417   | Lipid and atherosclerosis                                                    | 20               | 0.0009   | 0.02154  |
| hsa05171   | Coronavirus disease - COVID-19                                               | 21               | 0.00096  | 0.02154  |

**Abbreviations:** GO, Gene Ontology; KEGG, Kyoto Encyclopedia of Genes and Genomes; BP, Biological process; CC, Cellular component; MF, Molecular Function
